# Supplementary material for: Elucidating the phenotypic variability associated with the polyT tract and TG repeats in CFTR
Source: medRxiv preprint, doi:10.1101/2020.12.02.20242719, version 1 (2020-12-04)
Supplement: Supplemental Table 1 [file 242719_file02.docx]

**Supplement to: Elucidating the phenotypic variability associated with the polyT tract and TG repeats in CFTR**

**Authors:** Keith Nykamp, Rebecca Truty, Darlene Riethmaier, Julia Wilkinson, Sara L. Bristow, Sienna Aguilar, Dana Neitzel, Nicole Faulkner, Stephanie Kahan, Swaroop Aradhya

**Supplemental Table 1. CFTR-related categories and associated symptoms**

|  | **CFTR-related symptoms** |
| --- | --- |
| Chronic Sinopulmonary disease | Bronchiectasis |
| Respiratory distress |
| Recurrent respiratory infections/pseudomonas |
| Chronic cough and sputum production |
| Chronic wheeze and air trapping |
| Pancreatic disease | Pancreatic insufficiency |
| Recurrent pancreatitis |
| Gastrointestinal and nutritional deficiency | Meconium ileus |
| Malabsorption |
| Rectal prolapse |
| Failure to thrive |
| Steatorrhea |
| Salt-loss syndrome | Acute salt depletion |
| Chronic metabolic alkalosis |
| Hyponatremic hypochloremic dehydration |
| Male infertility | Obstructive azoospermia or CAVD |
| Non-obstructive azoospermia |
| Labs | Elevated sweat chloride (>60 mEq/L) |
| Intermediate sweat chloride (30-60 mEq/L) |
| Hypertripsinemia |
| Stated diagnosis (only applied if no symptoms provided) | Suspected Dx of CF |
| Clinical Dx of CF |

CAVD, congenital absence of the vas deferens; CF, cystic fibrosis; Dx, diagnosis.
